# Supplementary material for: An association mapping approach to identify favourable alleles for tomato fruit quality breeding
Source: PubMed Central journal article supplement (PMC4266912; doi:10.1186/s12870-014-0337-9), 2014-12-03

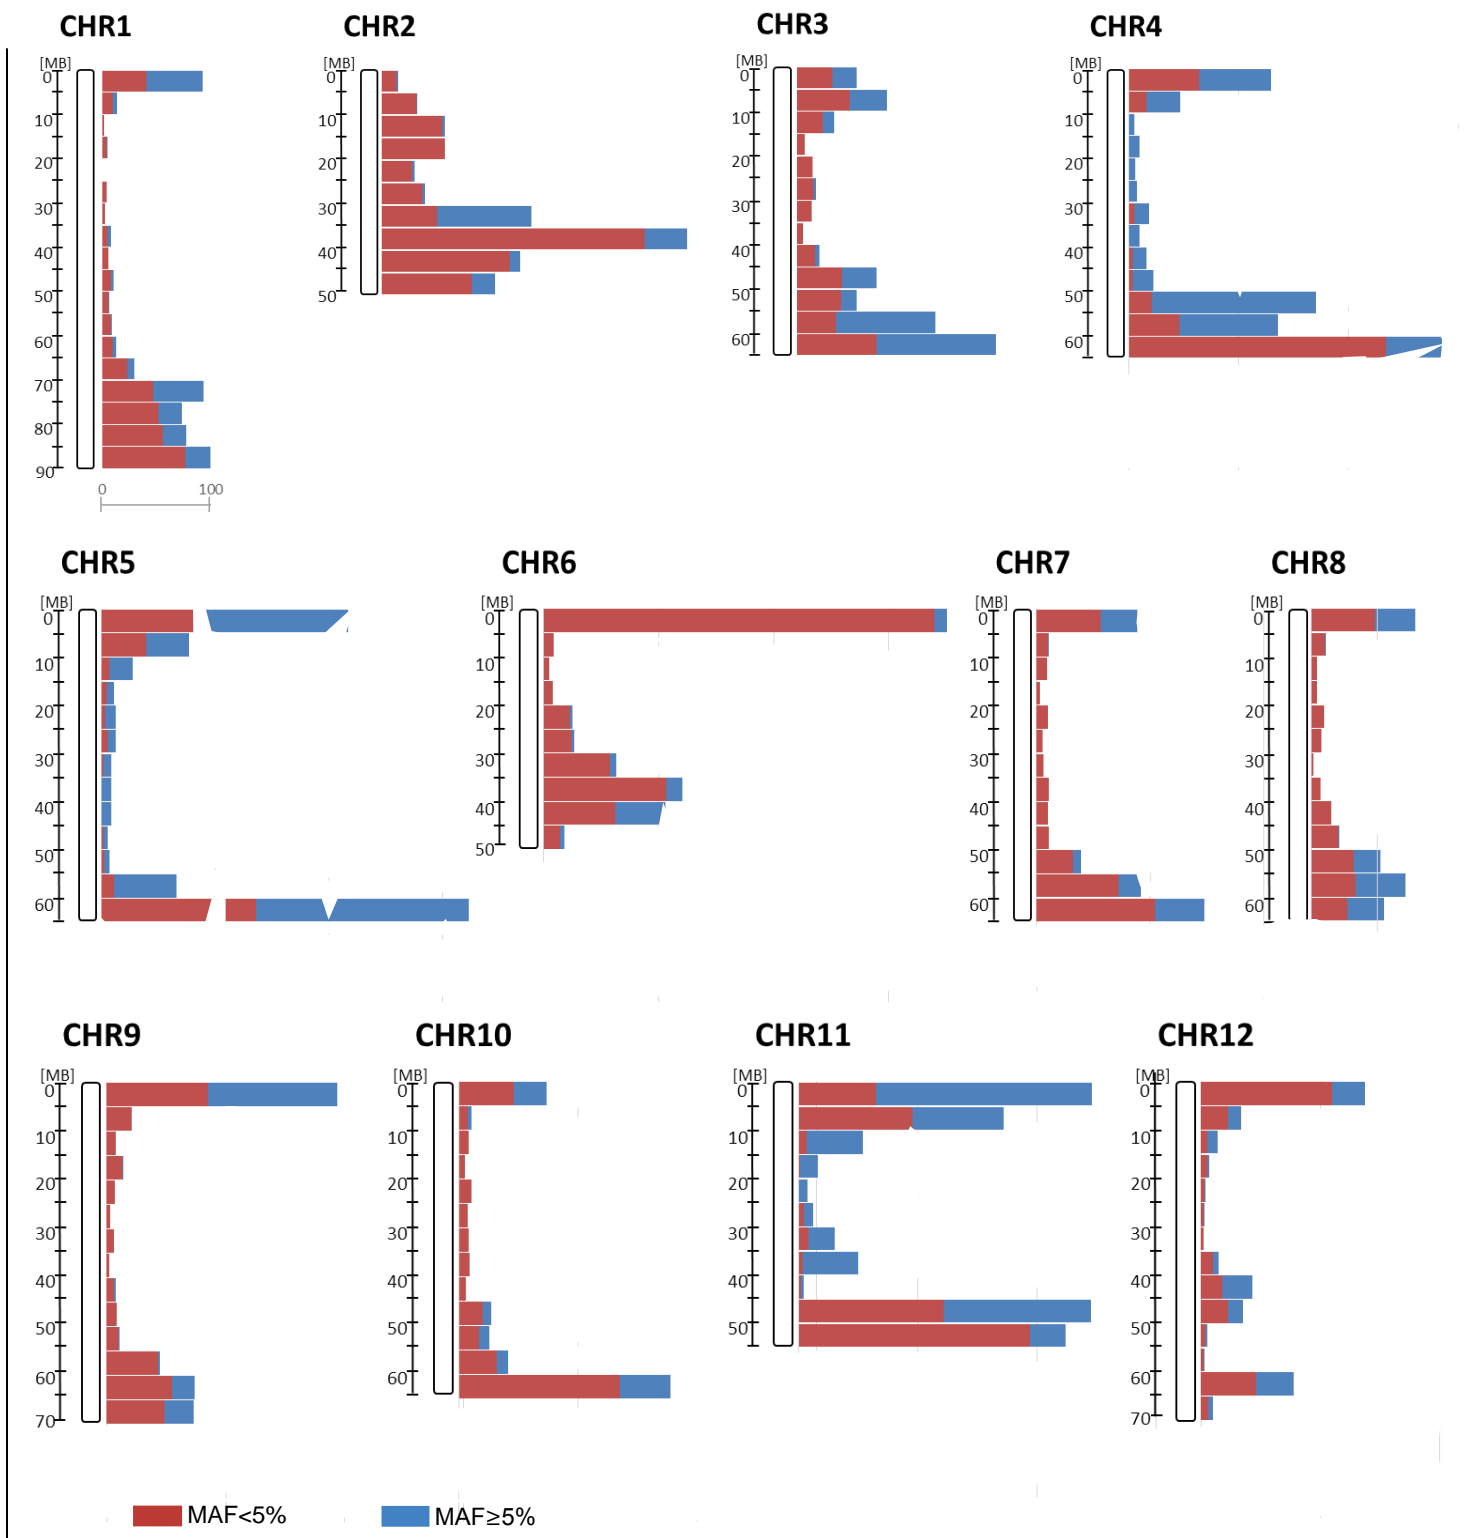

Supplement: 12870_2014_337_MOESM3_ESM.pdf [file 12870_2014_337_MOESM3_ESM.pdf]
